# Supplementary material for: INVESTIGATIONS WITH A SERVO APPARATUS
Source: Hindawi journal article supplement (doi:10.1155/2018/7918258), 1960-01-01
Supplement: f1 [file 7918258.f1.zip]

## Appendix

**Figure S1-7. Meta-analysis results of acute/subacute toxicity**

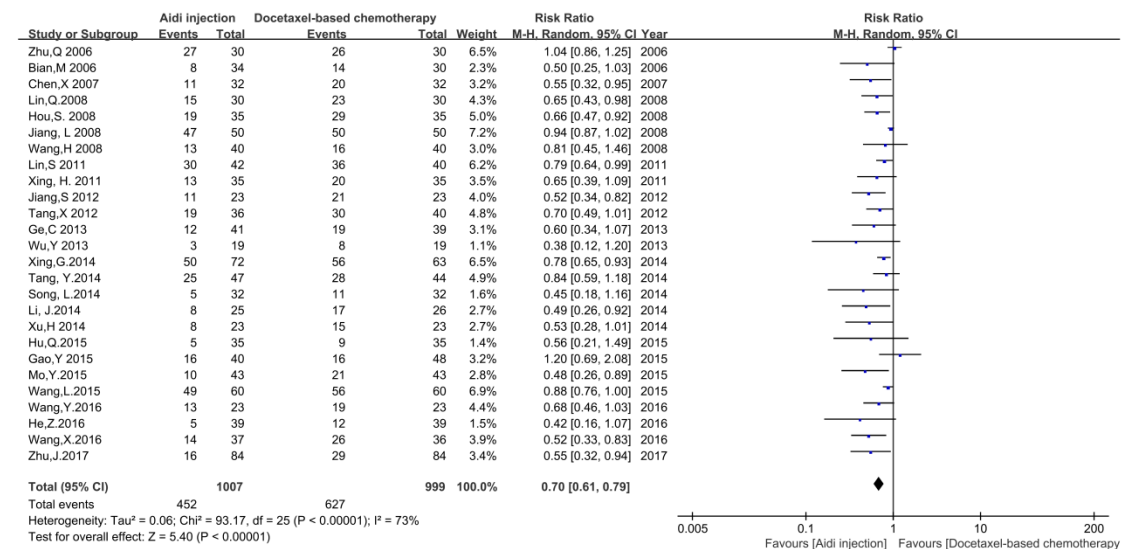

**Figure S1. The analysis of neutropenia between the two groups**

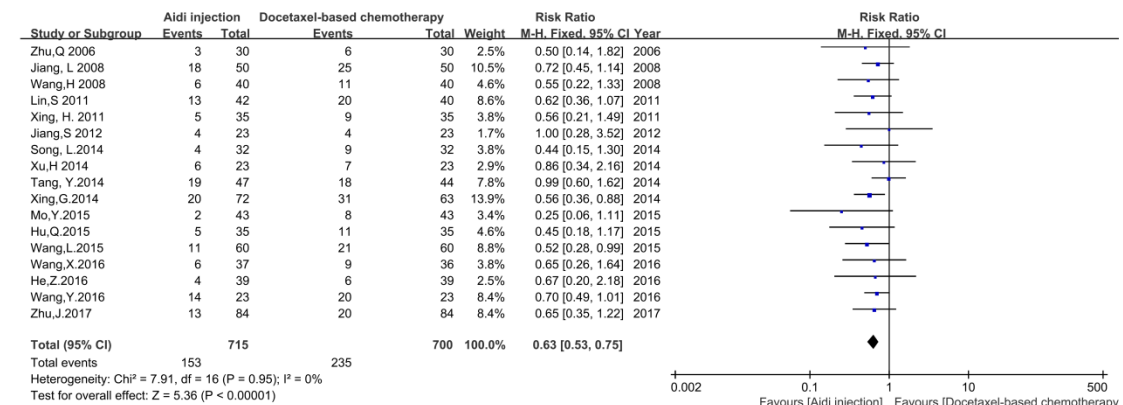

**Figure S2. The analysis of thrombocytopenia between the two groups**

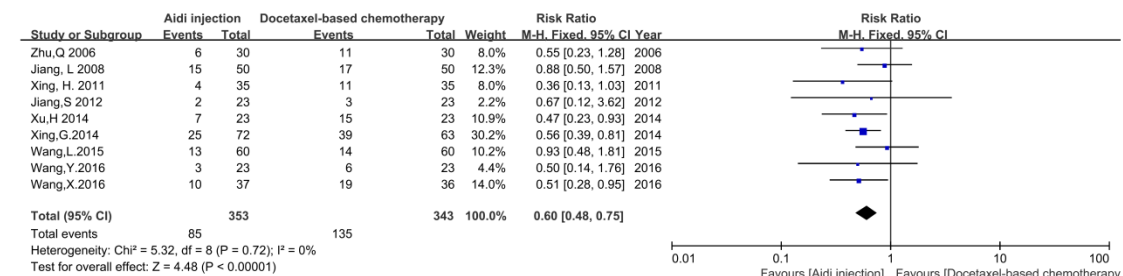

**Figure S3. The analysis of anemia between the two groups**

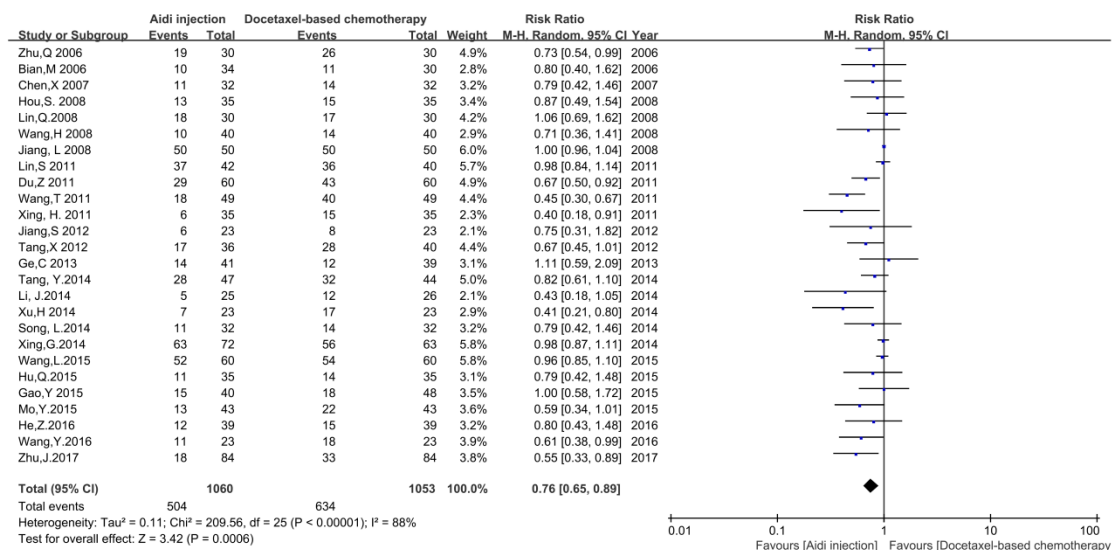

**Figure S4.The analysis of gastrointestinal toxicity between the two groups**

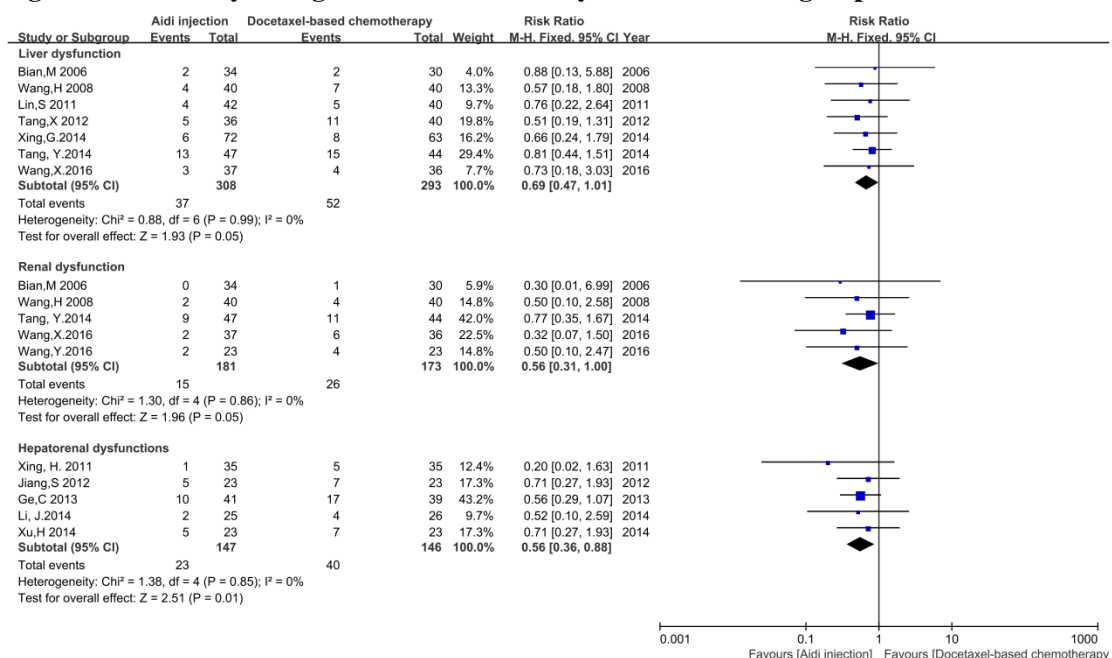

**Figure S5.The analysis of hepatorenal dysfunctions between the two groups**

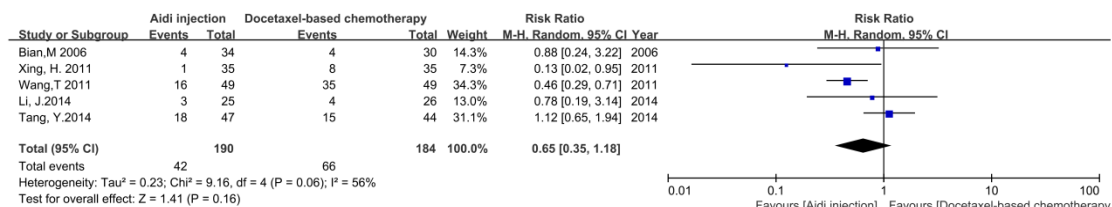

**Figure S6.The analysis of neurotoxicity between the two groups**

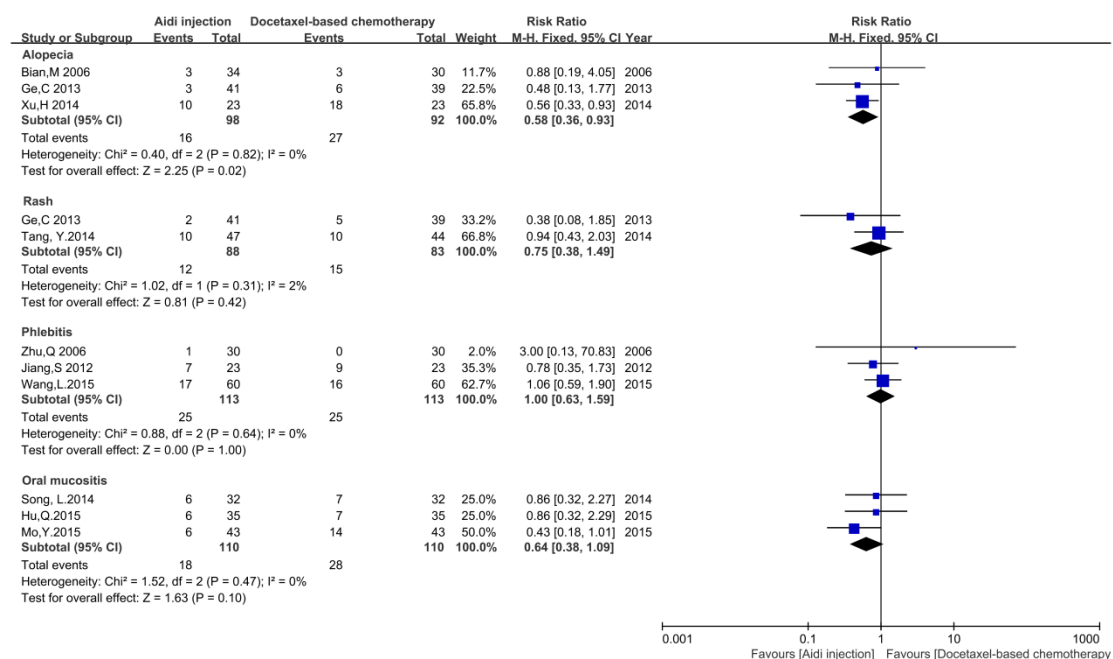

**Figure S7.**The analysis of other toxicity between the two groups

**Figure S8-13. Subgroups analysis of ORR and DCR**

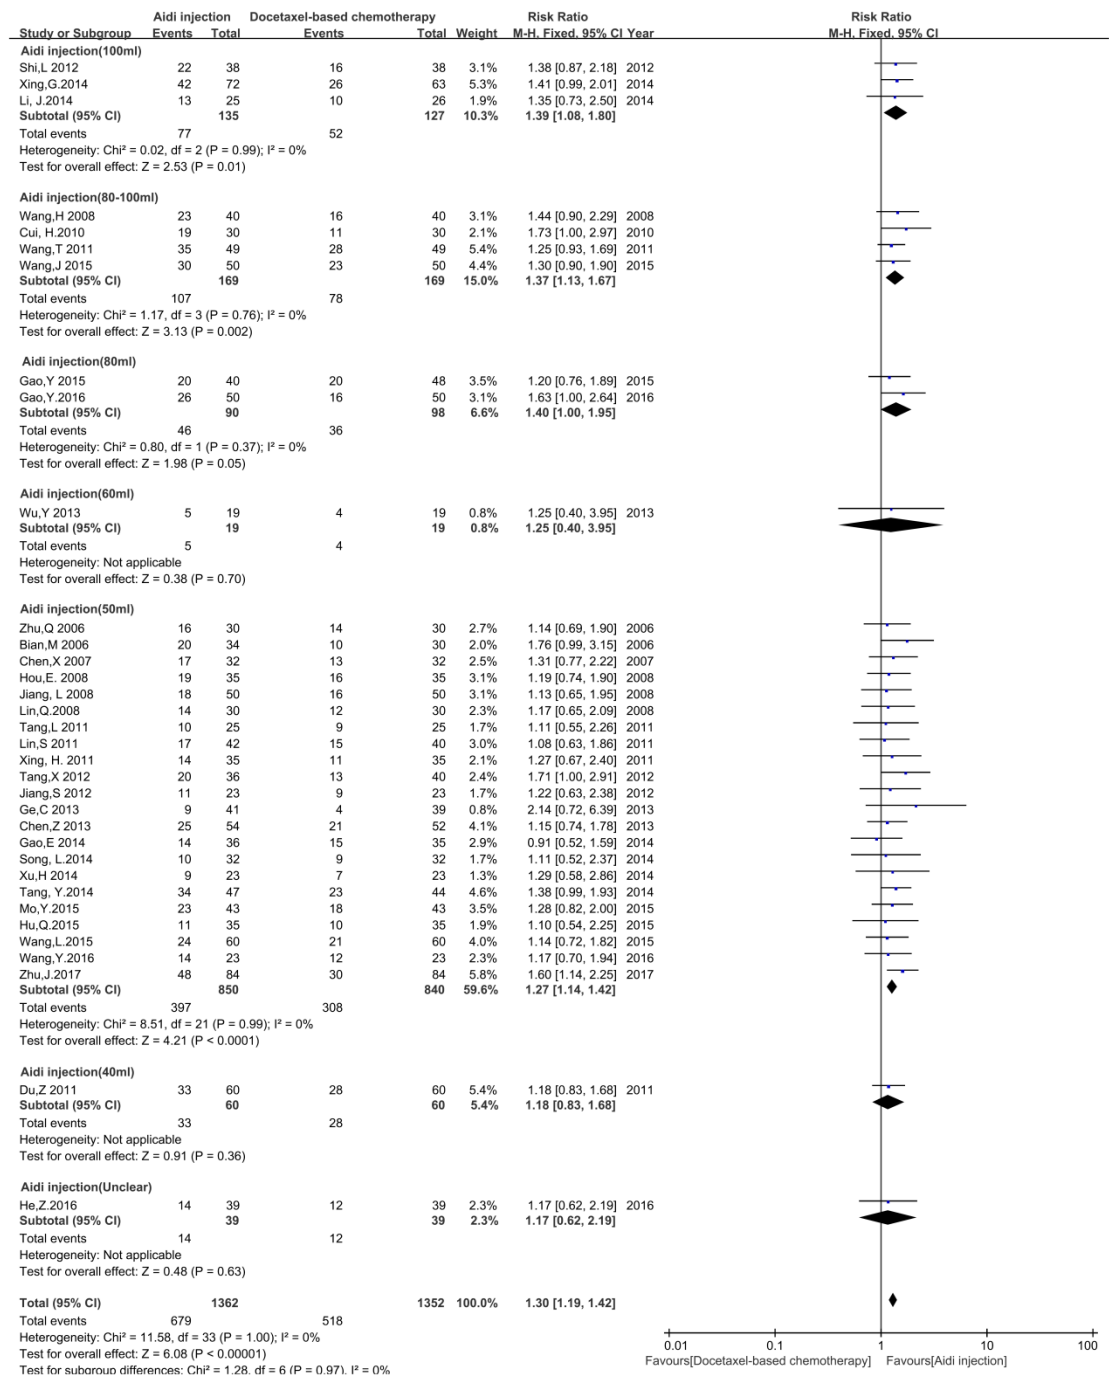

**Figure S8. Subgroup analysis of ORR via drug doses**

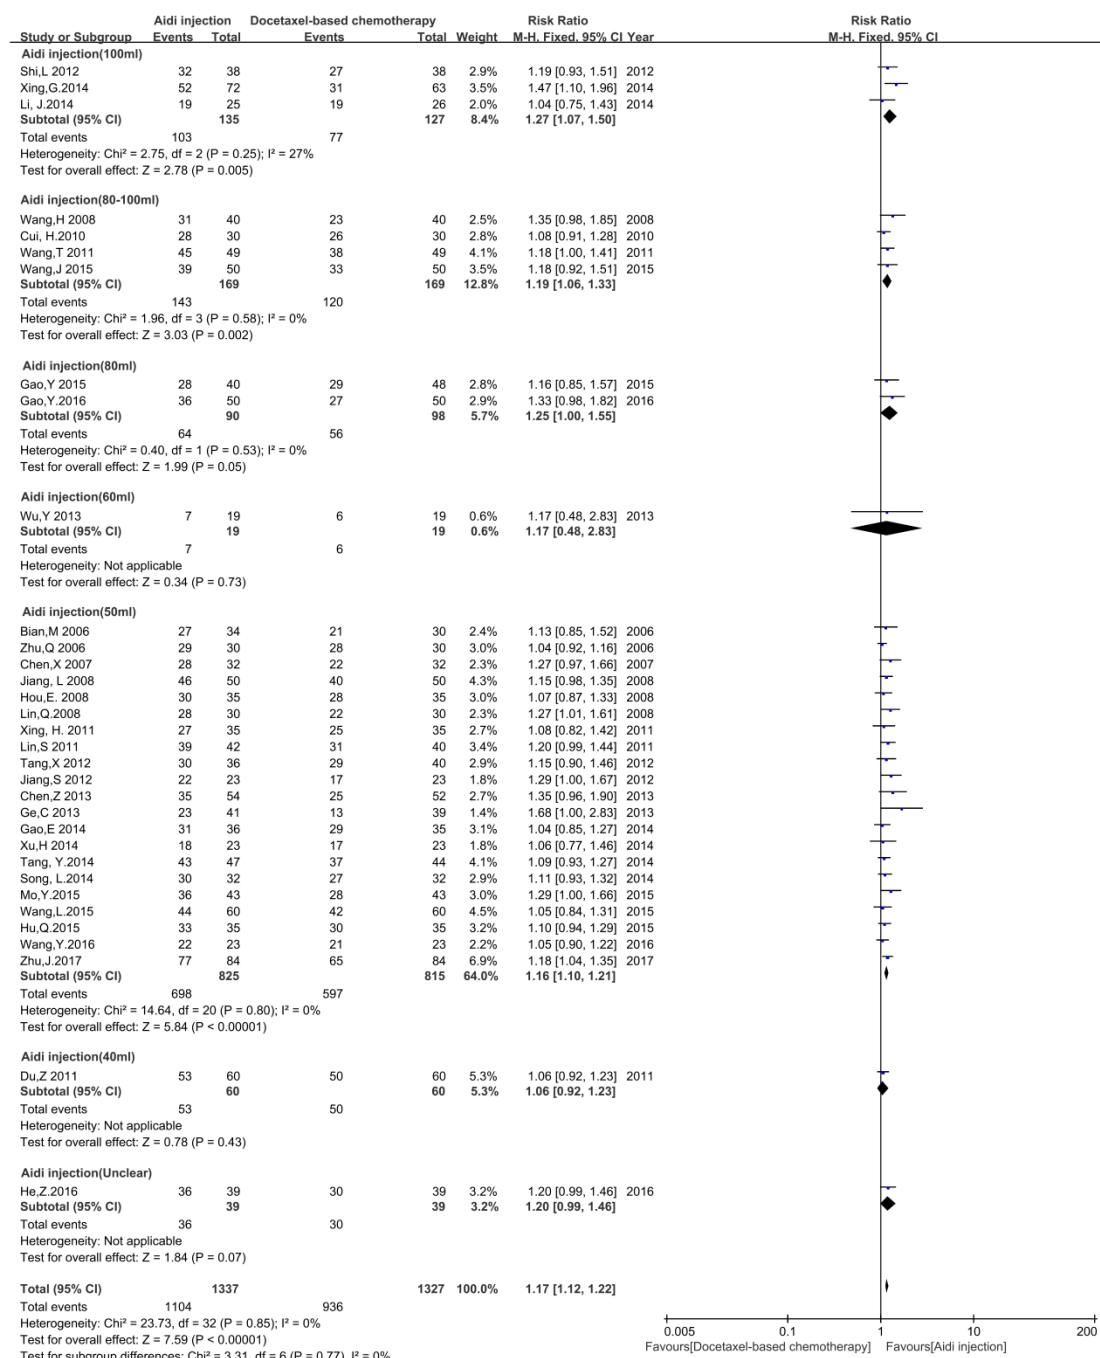

**Figure S9. Subgroup analysis of DCR via drug doses**

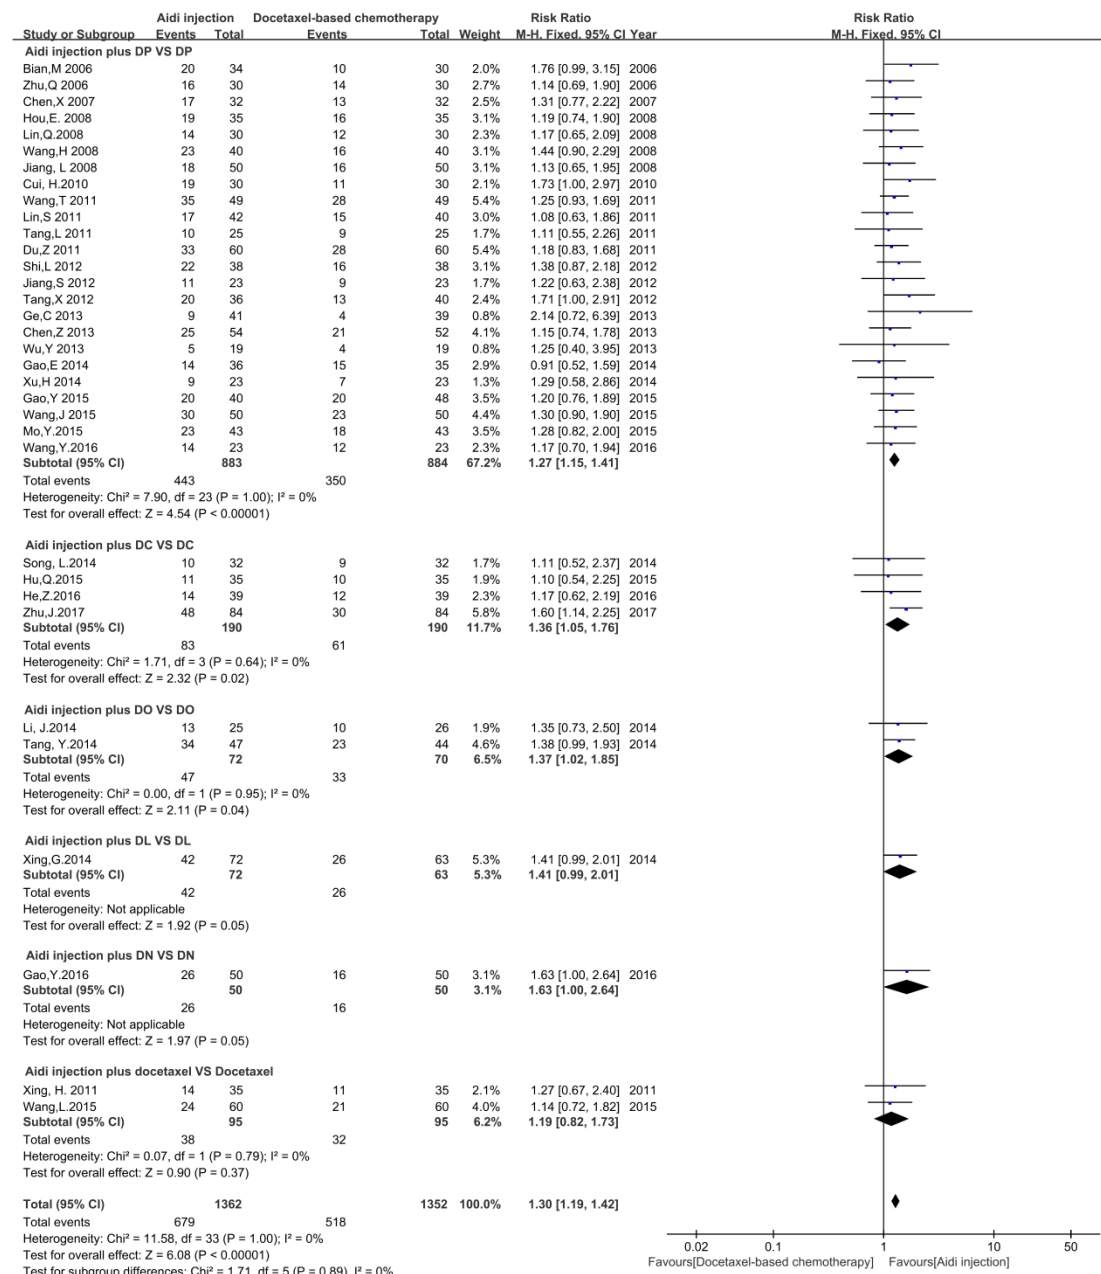

**Figure S10. Subgroup analysis of ORR via docetaxel-based chemotherapy**

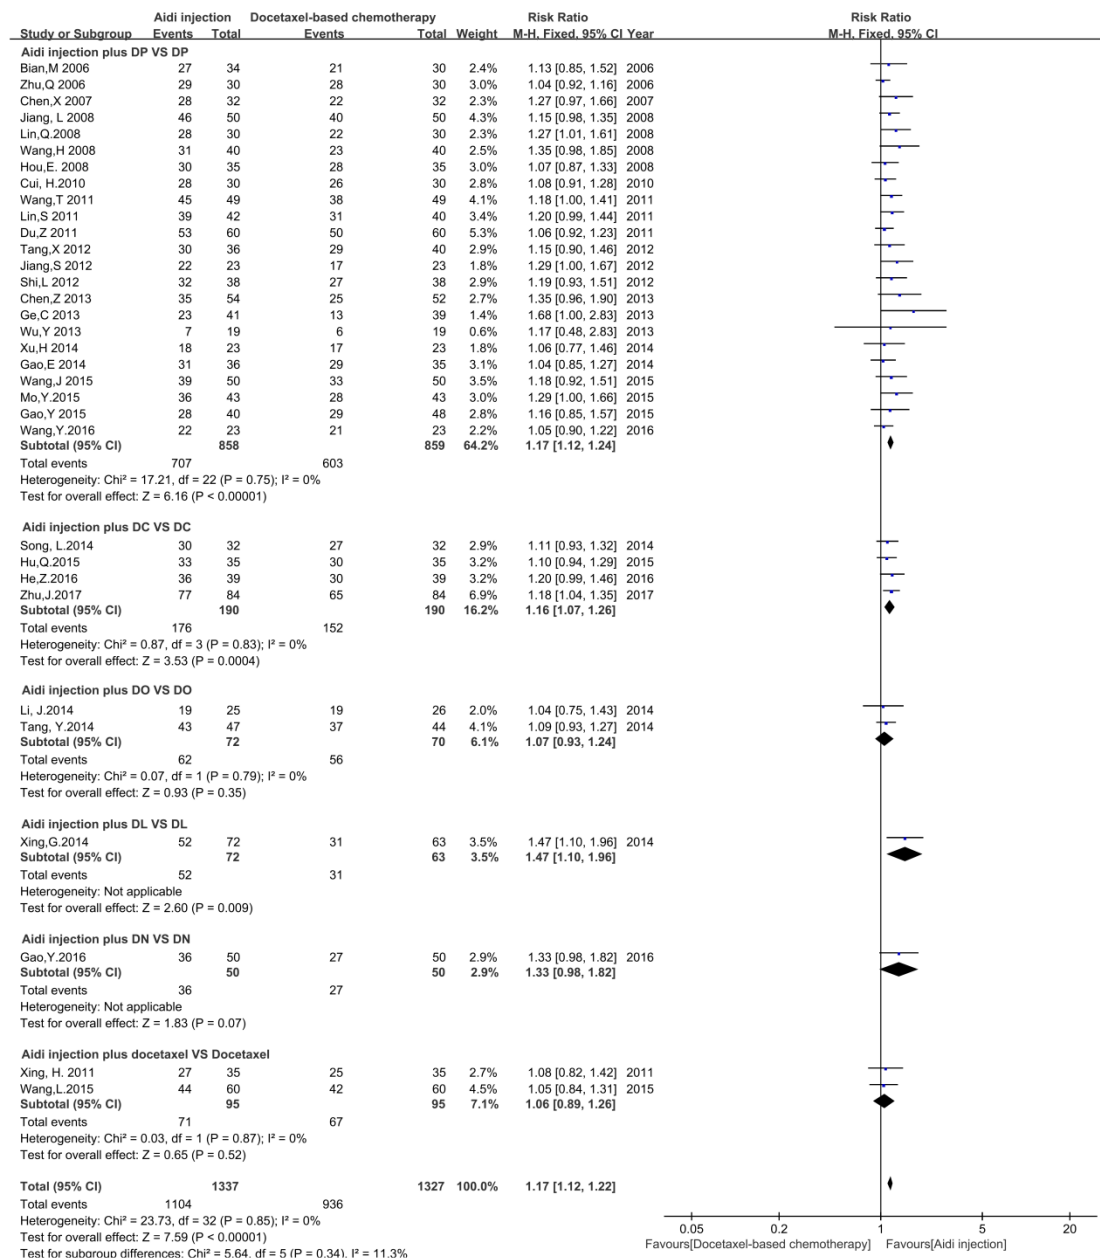

**Figure S11. Subgroup analysis of DCR via docetaxel-based chemotherapy**

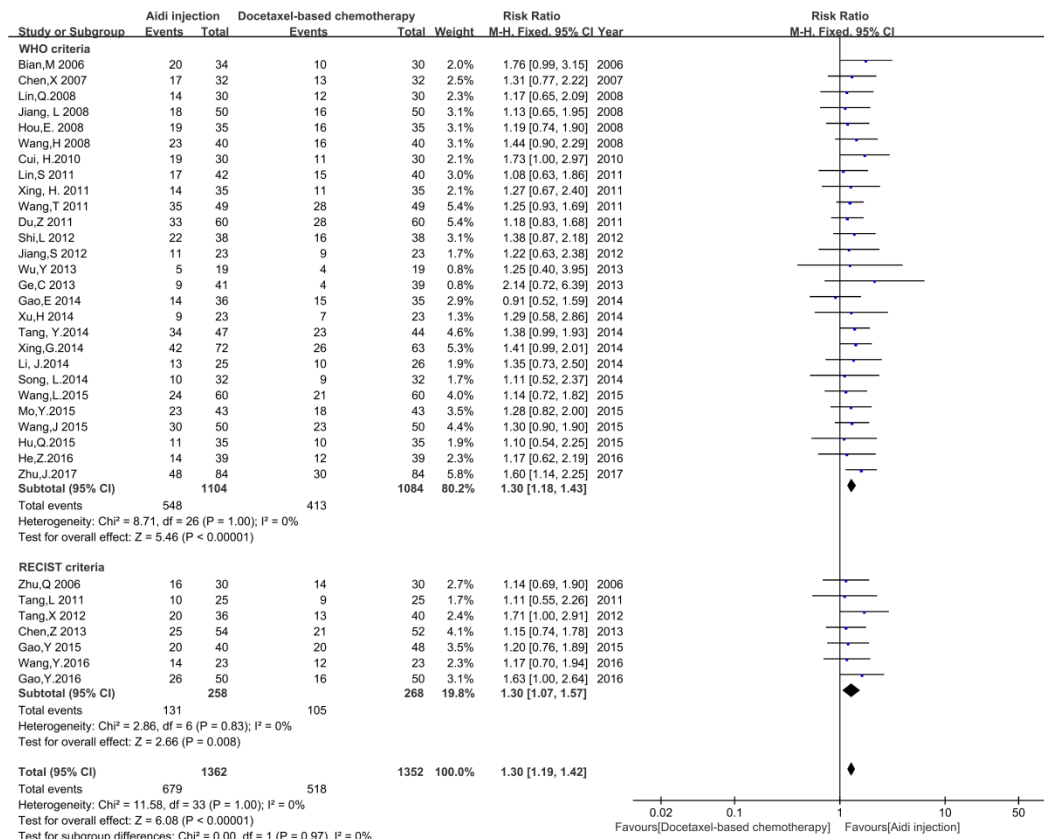

**Figure S12. Subgroup analysis of ORR via evaluation criteria**

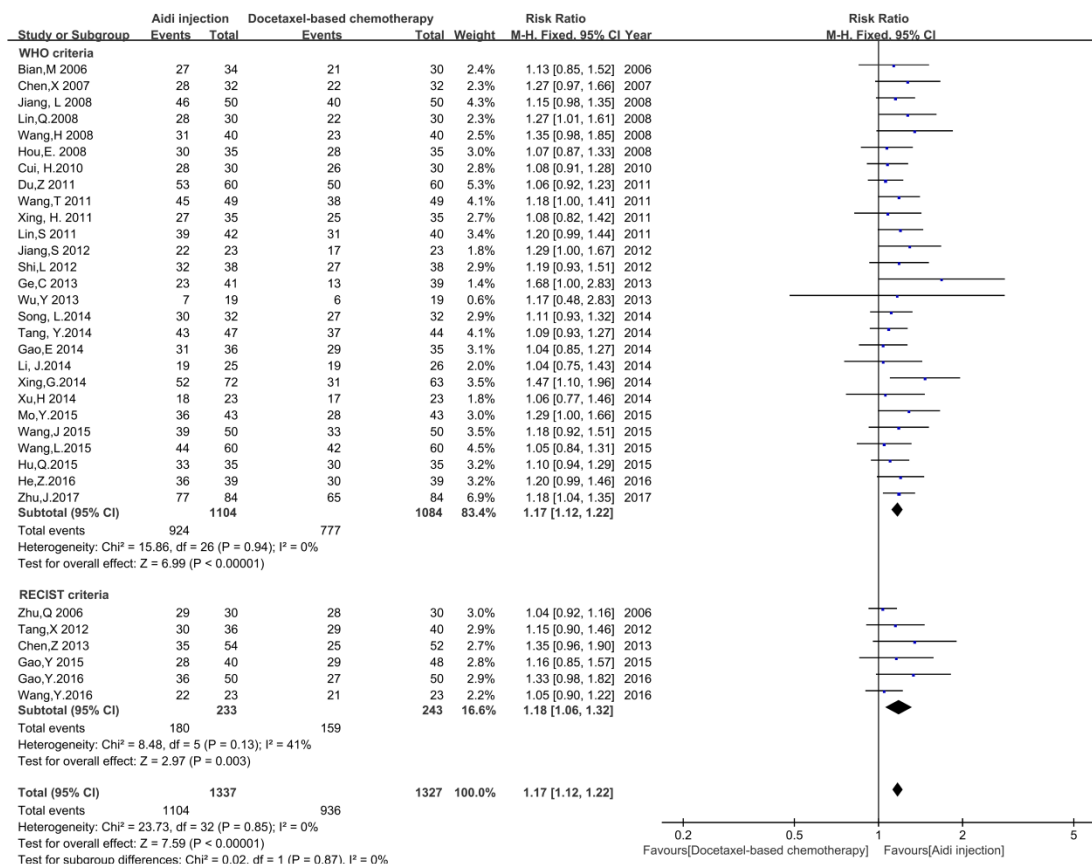

**Figure S13. Subgroup analysis of DCR via evaluation criteria**
